# Supplementary material
Source: Elsevier journal article supplement (https://www.sciencedirect.com/science/article/pii/S0025775314001924)
Supplement: mmc1 [file S0025775314001924:mmc1.pdf]

Anexo. Predictores de un resultado negativo del QTF-GIT y PT positiva con diferentes puntos de corte. Discordancia.(n=842)

|                       | QTF-GIT negativo<br>PT positivo (PT>5mm) |                              | QTF-GIT negativo<br>PT positivo (PT>10mm) |                              | QTF-GIT negativo<br>PT positivo (PT>15mm) |                              | QTF-GIT negativo<br>PT positivo (PT>20mm) |                              |
|-----------------------|------------------------------------------|------------------------------|-------------------------------------------|------------------------------|-------------------------------------------|------------------------------|-------------------------------------------|------------------------------|
|                       | Univariante<br>OR (IC 95%)               | Multivariante<br>OR (IC 95%) | Univariante<br>OR (IC 95%)                | Multivariante<br>OR (IC 95%) | Univariante<br>OR (IC 95%)                | Multivariante<br>OR (IC 95%) | Univariante<br>OR (IC 95%)                | Multivariante<br>OR (IC 95%) |
| Edad (años)           |                                          |                              |                                           |                              |                                           |                              |                                           |                              |
| - <14                 | 0.36 (0.13 – 1.02)                       |                              | 0.55 (0.19 – 1.58)                        |                              | 0.37 (0.05 – 2.82)                        |                              | 1.25 (0 – 9.36)                           |                              |
| - 14-16               | 0.67 (0.46 – 0.98)                       |                              | 0.83 (0.54 – 1.27)                        |                              | 0.99 (0.53 – 1.86)                        |                              | 0.92 (0.18 – 4.29)                        |                              |
| - >16                 | Referencia                               |                              | Referencia                                |                              | Referencia                                |                              | Referencia                                |                              |
| Región de procedencia |                                          |                              |                                           |                              |                                           |                              |                                           |                              |
| - Otros               | Referencia                               | Referencia                   | Referencia                                | Referencia                   | Referencia                                | Referencia                   | Referencia                                | Referencia                   |
| - Subsahariana        | 3.02 (2.00 – 4.56)                       | 3.08 (2.02 – 4.69)           | 3.71 (2.38 – 5.78)                        | 3.75 (2.39 – 5.88)           | 6.06 (3.21 – 11.4)                        | 6.06 (3.21 – 11.4)           | 6.19 (1.64 – 23.3)                        | 6.78 (1.77 – 26.0)           |
| Cicatriz BCG          |                                          |                              |                                           |                              |                                           |                              |                                           |                              |
| - Sí                  | 2.09 (1.42 – 3.06)                       | 2.16 (1.46 – 3.20)           | 1.84 (1.20 – 2.83)                        | 1.91 (1.23 – 2.97)           | 1.22 (0.62 – 2.42)                        |                              | 1.01 (0.19 – 5.22)                        | 1.02 (0.19 – 5.32)           |
| - No                  | Referencia                               | Referencia                   | Referencia                                | Referencia                   | Referencia                                |                              | Referencia                                | Referencia                   |
| - Desconocido         | 0.41 (0.13 – 1.36)                       | 0.44 (0.13 – 1.45)           | 0.55 (0.17 – 1.84)                        | 0.60 (0.18 – 2.01)           | 0.87 (0.20 – 3.78)                        |                              | 4.90 (0.92 – 25.9)                        | 5.97 (1.08 – 33.9)           |

PT: prueba de tuberculina

QTF-GIT: QuantiFERON-TB Gold IN-Tube

BCG: Bacilo Calmette-Guérin

OR (IC 95%): Odds ratio con un intervalo de confianza del 95%
